# Supplementary material
Source: PubMed Central journal article supplement (PMC5753595)
Supplement: NIHMS797821-supplement-Slip_Vid3_caption_pdf.pdf [file NIHMS797821-supplement-Slip_Vid3_caption_pdf.pdf]

### **Supplementary Video 3.**

The frictionless (“edge mode”) model is used to simulate a rat protracting the entire vibrissal array against and past a vertical peg. Each whisker is shown in gray until it makes contact with the peg, at which point its color changes to red. Once a whisker slips past the peg, it is shown in green.
